# Supplementary material for: A self-assembling protein–DNA complex with an inbuilt DNA release system for quantitative immuno-PCR applications
Source: Royal Society of Chemistry journal article supplement (doi:10.1039/d4sd00225c), 2024-01-01
Supplement: d4sd00225c1.pdf [file d4sd00225c1.pdf]

## **A self-assembling protein-DNA complex with an inbuilt DNA release system for quantitative immuno-PCR applications**

Alanna E. Sorenson and Patrick M. Schaeffer\*

### **ESI**

### **Materials and Methods**

#### ***Oligonucleotides***

Two oligonucleotides were designed to include the *E. coli bioO* target sequence:

5' -TAATCGACTTGTAACCAAATTGAAAAGATTTAGGTTTACAAGTCTACAC-3'

5' -GTGTAGACTTGTAACCTAAATCTTTTCAATTTGGTTTACAAGTCGATTA-3'

The qPCR *bioO* template was annealed at a final concentration of 50  $\mu$ M (20 mM Tris pH 8.0, 150 mM NaCl) following denaturation for 2 min at 80°C and slow cooling. The qPCR *bioO* template was stored at -20°C.

Sequences for qPCR primers:

Forward 5' -TAATCGACTTGTAACCAAATTG-3'

Reverse 5' -GTGTAGACTTGTAACCTAAATC-3'

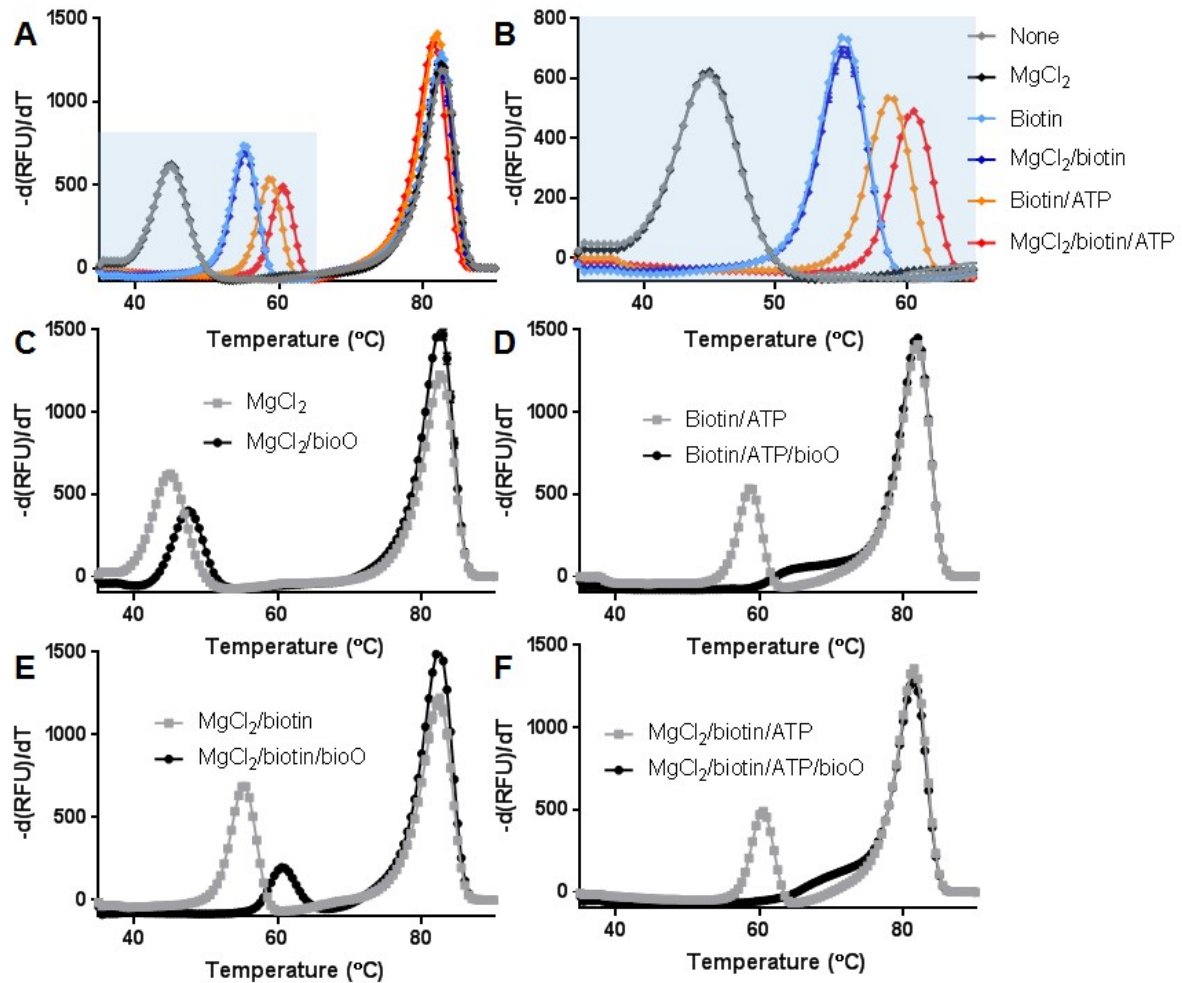

**Fig. S1** Ligand effects on Ec BirA-GFP melt-curves in PBS-T. A) Ec BirA-GFP (1  $\mu\text{M}$ ) was incubated for 10 min at RT with combinations of biotin (1 mM), ATP (1 mM) and  $\text{MgCl}_2$  (5 mM) in PBS-T prior to analysis by DSF-GTP melt-curve protocol (35-90 $^{\circ}\text{C}$  at 0.5 $^{\circ}\text{C}/30$  s). B) Detail of the BirA region of the Ec BirA-GFP curves from (A). Comparison between Ec BirA-GFP curves in the presence and absence of *bioO* (1  $\mu\text{M}$ ) with (C)  $\text{MgCl}_2$ , (D) biotin/ATP, (E)  $\text{MgCl}_2$ /biotin and (F)  $\text{MgCl}_2$ /biotin/ATP. Data represent averages and SD of three melt-curves.

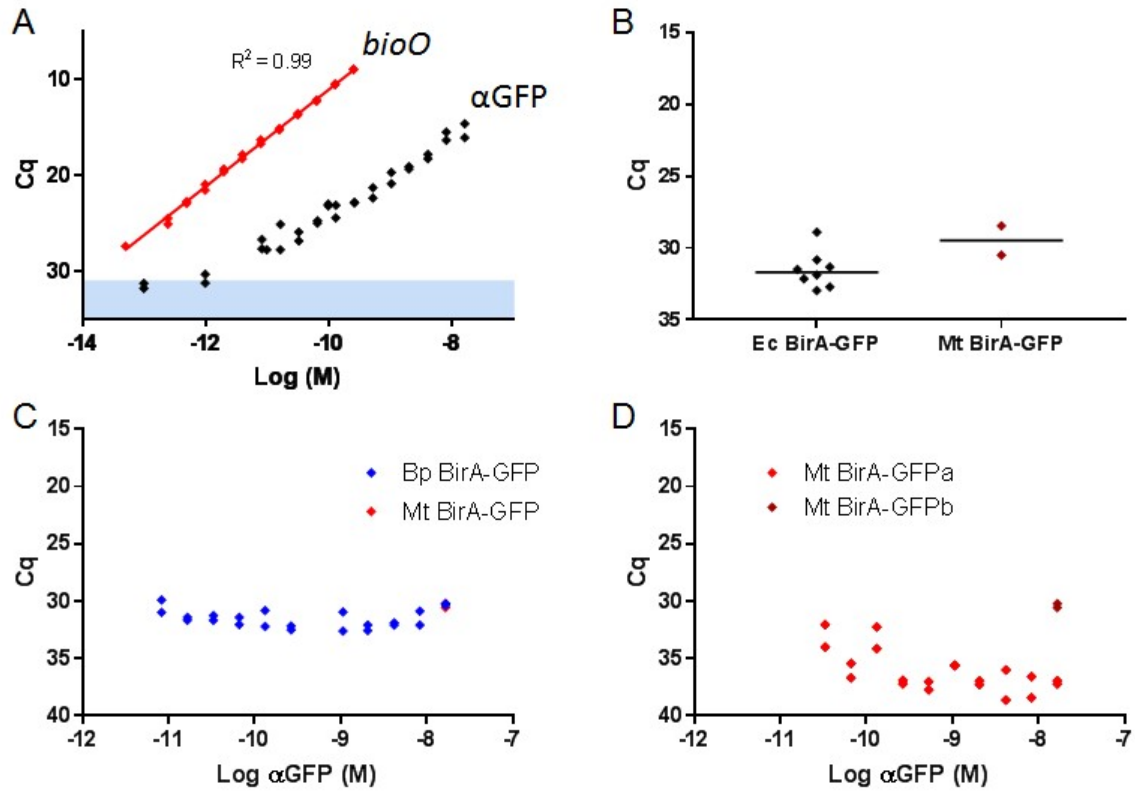

**Fig. S2** A) qPCR standard curve of *bioO* and comparison with qI PCR detection of preadsorbed polyclonal anti-GFP IgG ( $\alpha\text{GFP}$ ) with preassembled *Ec BirA-GFP:bioO* in PBS-TBA (cf Fig. 3 in main article). See ESI methods for details of the *bioO* template and primer sequences. B) No anti-GFP IgG qI PCR with preassembled *Ec BirA-GFP:bioO* or *Mt holoBirA-GFP* in the presence of *bioO*. C) qI PCR with *Bp holoBirA-GFP* in the presence of *bioO*. D) qI PCR with *Mt BirA-GFP* in the presence of *bioO*. Concentrations of anti-GFP IgG are as indicated. All replicates are shown.
